# Supplementary material for: Genome-Wide Analysis of CCA1-Like Proteins in Soybean and Functional Characterization of GmMYB138a
Source: MDPI journal article supplement (doi:10.3390/ijms18102040), 2017-09-22
Supplement: s1 [file s1]

## **Supplementary Materials**

**Figure S1:** Prediction of 14-3-3 binding site in GmMYB138a and GmMYB138b

**Table S1:** Characterization of CCA1-like proteins in soybean

**Table S2:** Statistic report of CCA1-like proteins in soybean

**Table S3:** Statistics report of CCA1-like genes in soybean

**Table S4:** Segmental duplication events of soybean CCA1-like genes during evolution

**Table S5:** The FPKM values of CCA1-like genes in different tissues

**Table S6:** Primers used in the study
