# Supplementary material for: Genome-Wide Analysis of CCA1-Like Proteins in Soybean and Functional Characterization of GmMYB138a
Source: Int J Mol Sci. 2017 Sep 22;18(10):2040. doi: 10.3390/ijms18102040 (PMC5666722; doi:10.3390/ijms18102040)
Supplement: Supplementary file 1 [file ijms-18-02040-s001.zip]

Archive with 9 entries (9 files):
- Table S5.xlsx
- Table S6.xlsx
- Fig S1.tif
- supplementary.pdf
- Table S1.xlsx
- Table S2.xlsx
- Table S3.xlsx
- Table S4.xlsx
- Table S4-2.xlsx
