# Supplementary material for: Genome-Wide Analysis of CCA1-Like Proteins in Soybean and Functional Characterization of GmMYB138a
Source: Int J Mol Sci. 2017 Sep 22;18(10):2040. doi: 10.3390/ijms18102040 (PMC5666722; doi:10.3390/ijms18102040)
Supplement: Supplementary file 1 [file ijms-18-02040-s001.zip › Table S1.xlsx]

## Sheet: Sheet1
Table S1 Characterization of CCA1-like proteins in soybean
ID	Position of MYB domain in protein	Position of Zn-finger domain in protein	Consensus sequence	Position of consensus sequence	Chromosomal localization	aa length	MW	pI	Subcellular localization
Glyma.01G003000	94-144	4-20	SHAQKYF	136-142	Chr01:363183..365184 reverse	278	30181.06	9.08	chlo: 10, mito: 3, nucl: 1
Glyma.01G038600	87-137	4-20	SHAQKYF	129-135	Chr01:4130643..4133350 forward	300	32222.12	9.7	nucl: 13, cysk: 1
Glyma.02G026300	91-141	4-20	SHAQKYF	133-139	Chr02:2350461..2352857 reverse	300	32166.19	9.86	chlo: 8, nucl: 6
Glyma.02G241000	59-107	NA	SHAQKFF	99-105	Chr02:42928962..42932788 reverse	436	48802.9	8.29	nucl: 8, chlo: 2, mito: 2, cyto: 1, golg_plas: 1
Glyma.03G177300	29-77	NA	SHAQKYF	23-29	Chr03:38990897..38994360 forward	253	27633.5	9.07	nucl: 11, chlo: 2, plas: 1
Glyma.03G261800	23-71	NA	SHAQKFF	63-69	Chr03:45502100..45510812 forward	748	82084.2	5.83	nucl: 13, cyto: 1
Glyma.04G051000	110-160	6-22	SHAQKYY	152-158	Chr04:4142878..4145133 forward	225	24773.80	9.66	nucl: 9, chlo: 2, mito: 2, plas: 1
Glyma.04G177300	78-128	NA	SHAQKYF	120-126	Chr04:44077247..44080103 reverse	292	31797.8	8.41	nucl: 12, chlo: 2
Glyma.05G032200	77-127	NA	SHAQKYF	119-125	Chr05:2802638..2804780 reverse	285	31007.6	9.27	nucl: 14
Glyma.05G062300	97-147	4-20	SHAQKYF	139-145	Chr05:5874594..5879302 reverse	333	36085	6.36	mito: 6, chlo: 5, nucl: 3
Glyma.05G222600	92-142	4-20	SHAQKYF	134-140	Chr05:40196173..40197937 reverse	266	29349.9	9.22	chlo: 8, nucl: 3, mito: 3
Glyma.06G051900	123-173	18-34	SHAQKYF	165-171	Chr06:3908172..3909900 forward	241	26417.7	9.58	chlo: 10, nucl: 3, mito: 1
Glyma.06G187600	78-128	NA	SHAQKYF	120-126	Chr06:16379094..16381975 forward	294	31869.7	8.61	nucl: 14
Glyma.07G048500	23-71	NA	SHAQKFF	63-69	Chr07:4102968..4114174 reverse	750	82316.4	6.13	nucl: 14
Glyma.07G066100	58-106	NA	SHAQKYF	98-104	Chr07:5960745..5967003 forward	331	36837.8	9.00	nucl: 14
Glyma.07G074300	22-72	NA	SHAQKYF	64-70	Chr07:6771948..6773405 reverse	385	43241.1	9.17	nucl: 12, chlo: 1, vacu: 1
Glyma.07G074500	28-76	NA	SHAQKYF	68-74	Chr07:6783392..6783919 reverse	91	10394.9	10.28	nucl: 6, extr: 3, chlo: 2, cyto: 2, cysk: 1
Glyma.08G029400	95-145	4-20	SHAQKYF	137-143	Chr08:2350286..2352108 reverse	267	29387	9.37	chlo: 8, mito: 3, nucl: 2, cysk: 1
Glyma.08G110200	107-156	NA	SHAQKYY	148-154	Chr08:8471393..8473156 forward	393	44845.78	5.74	nucl: 12, chlo: 1, vacu: 1
Glyma.08G293300	67-117	NA	SHAQKYF	109-115	Chr08:40840730..40842119 forward	206	23205.4	9.71	nucl: 10, cyto: 2, mito: 1, extr: 1
Glyma.08G333500	109-159	NA	SHAQKYI	151-157	Chr08:45075488..45076651 forward	387	44241.99	5.63	nucl: 13, chlo: 1
Glyma.08G333600	110-160	NA	SHAQKYF	152-158	Chr08:45088422..45089597 forward	391	45161.3	5.95	nucl: 12, chlo: 1, pero: 1
Glyma.09G131400	108-156	NA	SHAQKYF	148-154	Chr09:32746011..32753923 forward	353	39296.9	9.45	nucl: 13, cyto: 1
Glyma.09G167900	45-93	NA	SHAQKFF	85-91	Chr09:39203347..39207803 reverse	466	51784.9	5.62	nucl: 14
Glyma.09G255300	36-81	NA	SHAQKYF	73-79	Chr09:47470438..47474331 forward	287	32646.8	9.74	nucl: 13, chlo: 1
Glyma.10G048500	35-83	NA	SHAQKYF	75-81	Chr10:4363155..4368939 forward	294	32093.2	7.1	chlo: 7, nucl: 6, pero: 1
Glyma.10G118400	80-130	NA	SHAQKYF	122-128	Chr10:29961364..29962704 reverse	161	18556.1	9.35	nucl: 6, cyto: 6, plas: 1, extr: 1
Glyma.10G230700	53-101	NA	SHAQKYF	93-99	Chr10:46060022..46065739 forward	312	34753.5	9.22	nucl: 13, chlo: 1
Glyma.13G038200	9-59	NA	SHAQKYF	51-57	Chr13:11815808..11818199 forward	312	36341.2	5.55	mito: 9, nucl: 3, cyto: 1, plas: 1
Glyma.13G136300	34-82	NA	SHAQKYF	74-80	Chr13:24891067..24896379 forward	301	33164.6	8.48	nucl: 7, chlo: 5, plas: 1, pero: 1
Glyma.13G152300	58-106	NA	SHAQKFF	98-104	Chr13:26688264..26691680 reverse	287	31820.5	7.12	nucl: 14
Glyma.13G354800	108-158	4-20	SHAQKYF	150-156	Chr13:44319803..44323272 reverse	356	38627.4	9.1	nucl: 7, chlo: 5, plas: 1, cysk: 1
Glyma.14G093800	123-173	6-22	SHAQKFF	165-171	Chr14:8728200..8730331 forward	267	29573.3	9.25	nucl: 9, mito: 3, plas: 1, cysk: 1
Glyma.14G120600	20-70	NA	SHAQKYF	62-68	Chr14:17133328..17134318 forward	129	14990.8	9.22	nucl: 10, cyto: 3, chlo: 1
Glyma.14G202600	20-70	NA	SHAQKYF	62-68	Chr14:46775998..46777307 reverse	147	16761.8	9.45	cyto: 3, mito: 3, pero: 3, chlo: 2, nucl: 2, plas: 1
Glyma.14G210600	59-107	NA	SHAQKFF	99-105	Chr14:47557927..47561596 reverse	436	48648.4	7.26	nucl: 14
Glyma.15G019400	112-162	4-20	SHAQKYF	154-160	Chr15:1504955..1508151 forward	360	39229.06	8.97	chlo: 7, nucl: 4, mito: 2, cysk: 1
Glyma.16G017400	23-71	NA	SHAQKFF	63-69	Chr16:1526133..1539596 reverse	750	82412.37	5.85	nucl: 14
Glyma.16G032600	58-106	NA	SHAQKYF	98-104	Chr16:3082737..3089050 forward	332	36787.65	9.05	nucl: 14
Glyma.16G178700	56-104	NA	SHAQKYF	96-102	Chr16:33941617..33948775 forward	301	33551.15	9.22	nucl: 14
Glyma.16G217700	55-103	NA	SHAQKFF	95-101	Chr16:37466285..37470876 reverse	477	52818.87	5.67	nucl: 13, cyto: 1
Glyma.17G094400	78-128	NA	SHAQKYF	120-126	Chr17:7393359..7395553 forward	287	31159.64	9.21	nucl: 14
Glyma.17G144100	97-147	4-20	SHAQKYF	139-145	Chr17:11769385..11773512 reverse	333	36013.89	6.64	nucl: 5, mito: 5, chlo: 4
Glyma.17G229800	64-114	NA	SHAQKYF	106-112	Chr17:38475630..38477885 reverse	207	23321.28	9.86	nucl: 7, mito: 4, chlo: 2, plas: 1
Glyma.18G044200	59-107	NA	SHAQKFF	99-105	Chr18:3813589..3817289 reverse	361	39790.94	8.66	nucl: 10, cyto: 2, chlo: 1, cysk: 1
Glyma.18G075100	2-49	NA	SHAQKYF	41-47	Chr18:7125761..7126192 forward	143	16966.07	6.44	nucl: 10, cyto: 4
Glyma.18G129900	67-117	NA	SHAQKYF	109-115	Chr18:17743765..17746924 reverse	206	23040.95	9.77	nucl: 13, cyto: 1
Glyma.18G156000	289-339	NA	SHAQKYF	331-337	Chr18:33994797..34002001 reverse	1123	127154.96	5.92	chlo: 10, cyto: 2, nucl: 1, mito: 1
Glyma.18G237700	38-86	NA	SHAQKYF	78-84	Chr18:52631643..52637139 reverse	308	35196.00	9.69	nucl: 13, chlo: 1
Glyma.19G060700	155-204	NA	SHAQKYF	196-202	Chr19:12112589..12113599 forward	288	33374	6.37	nucl: 11, chlo: 1, cyto: 1, pero: 1
Glyma.19G178000	25-73	NA	SHAQKYF	65-71	Chr19:43718461..43721894 forward	289	31895.29	8.84	nucl: 7, chlo: 3, mito: 2, plas: 1, pero: 1
Glyma.19G260900	93-141	NA	SHAQKFF	133-139	Chr19:50396380..50409947 forward	819	89791.13	6.15	chlo: 7, nucl: 5, plas: 1, pero: 1
Glyma.20G097900	127-176	NA	SHAQKYF	168-174	Chr20:34120493..34121359 forward	259	29630.52	7.78	nucl: 7, cyto: 4, extr: 2, chlo: 1
Glyma.20G162800	54-127	NA	SHAQKYF	119-125	Chr20:40038694..40044197 reverse	329	36812.70	9.05	pero: 11, cyto: 2, nucl: 1
