# Supplementary material for: Genome-Wide Analysis of CCA1-Like Proteins in Soybean and Functional Characterization of GmMYB138a
Source: Int J Mol Sci. 2017 Sep 22;18(10):2040. doi: 10.3390/ijms18102040 (PMC5666722; doi:10.3390/ijms18102040)
Supplement: Supplementary file 1 [file ijms-18-02040-s001.zip › Table S2.xlsx]

## Sheet: Sheet1
Table S2 Statistic report of CCA1-like MYB proteins in soybean
Gene ID	Glyma.01G003000	Glyma.01G038600	Glyma.02G026300	Glyma.02G241000	Glyma.03G177300	Glyma.03G261800	Glyma.04G051000	Glyma.04G177300	Glyma.05G032200	Glyma.05G062300	Glyma.05G222600	Glyma.06G051900	Glyma.06G187600	Glyma.07G048500	Glyma.07G066100	Glyma.07G074300	Glyma.07G074500	Glyma.08G029400	Glyma.08G110200	Glyma.08G293300	Glyma.08G333500	Glyma.08G333600	Glyma.09G131400	Glyma.09G167900	Glyma.09G255300	Glyma.10G048500	Glyma.10G118400	Glyma.10G230700	Glyma.13G038200	Glyma.13G136300	Glyma.13G152300	Glyma.13G354800	Glyma.14G093800	Glyma.14G120600	Glyma.14G202600	Glyma.14G210600	Glyma.15G019400	Glyma.16G017400	Glyma.16G032600	Glyma.16G178700	Glyma.16G217700	Glyma.17G094400	Glyma.17G144100	Glyma.17G229800	Glyma.18G044200	Glyma.18G075100	Glyma.18G129900	Glyma.18G156000	Glyma.18G237700
Glyma.01G003000	278	0.2	0.2	0.05	0.06	0.03	0.27	0.19	0.2	0.21	0.51	0.28	0.19	0.03	0.07	0.03	0.13	0.52	0.1	0.21	0.09	0.1	0.08	0.05	0.06	0.09	0.17	0.07	0.09	0.08	0.07	0.22	0.29	0.12	0.11	0.06	0.22	0.03	0.07	0.07	0.04	0.2	0.2	0.24	0.06	0.1	0.21	0.58	0.07
Glyma.01G038600	76	300	0.91	0.07	0.06	0.03	0.2	0.37	0.4	0.3	0.24	0.21	0.36	0.03	0.07	0.03	0.13	0.24	0.11	0.46	0.1	0.1	0.08	0.05	0.07	0.09	0.2	0.07	0.1	0.09	0.07	0.3	0.21	0.11	0.13	0.06	0.29	0.03	0.08	0.07	0.05	0.39	0.29	0.19	0.06	0.11	0.46	0.05	0.07
Glyma.02G026300	76	279	300	0.07	0.06	0.03	0.21	0.37	0.39	0.29	0.24	0.21	0.36	0.03	0.07	0.03	0.13	0.24	0.12	0.47	0.1	0.1	0.07	0.05	0.07	0.09	0.2	0.07	0.1	0.09	0.07	0.28	0.22	0.11	0.13	0.06	0.28	0.03	0.08	0.07	0.05	0.38	0.29	0.19	0.06	0.11	0.46	0.05	0.07
Glyma.02G241000	30	36	37	436	0.11	0.15	0.05	0.08	0.07	0.06	0.05	0.05	0.08	0.15	0.17	0.01	0.04	0.05	0.07	0.06	0.07	0.06	0.14	0.31	0.16	0.17	0.06	0.17	0.07	0.17	0.45	0.06	0.05	0.05	0.05	0.9	0.06	0.14	0.17	0.15	0.3	0.07	0.05	0.06	0.54	0.07	0.06	0.03	0.16
Glyma.03G177300	24	25	24	52	253	0.06	0.04	0.05	0.06	0.06	0.05	0.04	0.05	0.06	0.32	0.01	0.05	0.05	0.05	0.06	0.06	0.06	0.29	0.1	0.32	0.75	0.04	0.35	0.05	0.55	0.12	0.06	0.04	0.05	0.05	0.13	0.05	0.06	0.32	0.34	0.09	0.06	0.06	0.05	0.13	0.08	0.05	0.02	0.35
Glyma.03G261800	28	29	29	119	50	748	0.03	0.03	0.03	0.03	0.03	0.03	0.04	0.72	0.08	0.01	0.02	0.03	0.04	0.03	0.04	0.05	0.08	0.14	0.08	0.09	0.03	0.09	0.05	0.09	0.12	0.04	0.03	0.03	0.03	0.15	0.04	0.73	0.08	0.08	0.14	0.03	0.03	0.03	0.14	0.03	0.03	0.02	0.08
Glyma.04G051000	85	73	74	28	17	27	225	0.18	0.18	0.19	0.3	0.84	0.18	0.03	0.06	0.01	0.15	0.31	0.1	0.23	0.09	0.09	0.08	0.05	0.05	0.07	0.21	0.06	0.09	0.07	0.07	0.22	0.46	0.13	0.11	0.05	0.21	0.03	0.06	0.06	0.05	0.18	0.2	0.37	0.06	0.12	0.24	0.06	0.06
Glyma.04G177300	70	129	129	42	19	31	66	292	0.67	0.25	0.2	0.18	0.92	0.04	0.08	0.03	0.12	0.2	0.12	0.37	0.11	0.11	0.09	0.06	0.07	0.08	0.2	0.08	0.12	0.08	0.1	0.25	0.18	0.11	0.12	0.08	0.25	0.04	0.08	0.08	0.05	0.66	0.25	0.18	0.08	0.1	0.37	0.06	0.07
Glyma.05G032200	73	135	134	36	23	32	65	204	285	0.26	0.21	0.18	0.66	0.04	0.08	0.03	0.13	0.21	0.12	0.39	0.11	0.11	0.09	0.06	0.08	0.09	0.21	0.09	0.12	0.09	0.09	0.25	0.19	0.12	0.14	0.07	0.25	0.03	0.09	0.09	0.06	0.9	0.26	0.2	0.07	0.1	0.39	0.06	0.08
Glyma.05G062300	82	110	109	32	26	32	75	96	98	333	0.22	0.19	0.25	0.03	0.08	0.04	0.1	0.22	0.11	0.24	0.09	0.09	0.09	0.06	0.07	0.08	0.16	0.09	0.09	0.08	0.07	0.48	0.21	0.11	0.11	0.06	0.48	0.03	0.08	0.09	0.06	0.26	0.96	0.18	0.07	0.09	0.24	0.06	0.07
Glyma.05G222600	150	85	86	29	21	31	91	75	75	85	266	0.29	0.19	0.03	0.07	0.02	0.15	0.93	0.1	0.22	0.09	0.09	0.08	0.05	0.07	0.08	0.18	0.07	0.09	0.07	0.08	0.22	0.3	0.12	0.12	0.05	0.22	0.03	0.06	0.08	0.05	0.21	0.21	0.26	0.07	0.11	0.22	0.1	0.07
Glyma.06G051900	90	77	77	29	17	29	203	67	68	78	92	241	0.17	0.03	0.06	0.02	0.14	0.3	0.11	0.22	0.08	0.09	0.07	0.05	0.05	0.07	0.2	0.06	0.1	0.06	0.07	0.22	0.46	0.14	0.12	0.05	0.21	0.03	0.06	0.06	0.05	0.18	0.2	0.36	0.06	0.12	0.23	0.06	0.05
Glyma.06G187600	69	126	125	43	20	33	64	272	201	95	71	65	294	0.04	0.07	0.03	0.12	0.19	0.12	0.36	0.11	0.11	0.09	0.06	0.07	0.08	0.2	0.08	0.12	0.08	0.1	0.25	0.17	0.11	0.12	0.08	0.25	0.04	0.08	0.08	0.05	0.65	0.25	0.18	0.08	0.1	0.37	0.06	0.07
Glyma.07G048500	27	33	32	118	50	549	26	34	34	31	31	30	36	750	0.08	0.01	0.02	0.03	0.04	0.03	0.04	0.04	0.08	0.14	0.08	0.09	0.03	0.09	0.05	0.09	0.12	0.04	0.03	0.03	0.03	0.15	0.04	0.95	0.08	0.09	0.14	0.04	0.03	0.03	0.14	0.03	0.03	0.03	0.08
Glyma.07G066100	32	33	33	75	107	67	27	33	33	36	29	27	32	68	331	0.02	0.06	0.07	0.07	0.07	0.09	0.09	0.45	0.14	0.58	0.43	0.07	0.52	0.08	0.41	0.18	0.08	0.07	0.08	0.08	0.17	0.08	0.08	0.9	0.52	0.14	0.08	0.08	0.08	0.18	0.09	0.07	0.03	0.62
Glyma.07G074300	18	16	15	12	8	10	8	16	15	21	13	11	16	13	13	385	0.02	0.03	0.04	0.04	0.03	0.03	0.02	0.01	0.01	0.02	0.03	0.02	0.02	0.02	0.01	0.03	0.02	0.02	0.02	0.01	0.03	0.01	0.02	0.02	0.01	0.03	0.04	0.02	0.01	0.05	0.03	0.01	0.01
Glyma.07G074500	37	40	41	20	15	21	35	38	38	37	41	37	37	21	24	10	91	0.15	0.07	0.19	0.08	0.08	0.05	0.04	0.07	0.07	0.22	0.06	0.09	0.06	0.06	0.1	0.14	0.21	0.18	0.04	0.09	0.02	0.06	0.06	0.04	0.12	0.1	0.17	0.05	0.16	0.18	0.03	0.06
Glyma.08G029400	150	86	87	29	21	30	94	75	74	85	251	94	71	30	29	15	41	267	0.1	0.22	0.09	0.1	0.07	0.05	0.07	0.08	0.19	0.07	0.09	0.07	0.08	0.22	0.3	0.12	0.12	0.05	0.22	0.03	0.06	0.08	0.05	0.21	0.21	0.26	0.07	0.11	0.22	0.09	0.07
Glyma.08G110200	46	48	50	39	26	34	47	53	51	51	46	49	52	37	35	21	32	47	393	0.1	0.19	0.18	0.08	0.08	0.06	0.08	0.09	0.07	0.11	0.07	0.07	0.1	0.1	0.08	0.08	0.06	0.1	0.04	0.07	0.08	0.08	0.12	0.11	0.09	0.07	0.1	0.1	0.04	0.07
Glyma.08G293300	70	142	143	30	21	25	65	111	115	86	71	66	111	27	30	17	40	71	44	206	0.09	0.09	0.08	0.06	0.06	0.08	0.26	0.08	0.1	0.08	0.08	0.25	0.22	0.15	0.16	0.06	0.25	0.03	0.08	0.07	0.05	0.38	0.23	0.23	0.06	0.13	0.85	0.05	0.07
Glyma.08G333500	43	44	44	42	30	40	39	47	47	42	40	38	47	39	45	20	32	41	78	38	387	0.79	0.08	0.06	0.09	0.08	0.08	0.09	0.12	0.08	0.07	0.09	0.07	0.09	0.08	0.07	0.1	0.04	0.09	0.08	0.06	0.11	0.09	0.07	0.07	0.21	0.09	0.04	0.09
Glyma.08G333600	47	43	42	36	30	44	40	47	45	42	43	41	47	37	46	20	33	45	76	39	313	391	0.08	0.06	0.09	0.09	0.09	0.09	0.12	0.08	0.07	0.09	0.08	0.09	0.08	0.06	0.1	0.04	0.09	0.08	0.06	0.11	0.09	0.08	0.07	0.2	0.09	0.04	0.09
Glyma.09G131400	34	35	35	69	112	69	34	38	38	45	34	33	39	71	175	15	20	33	39	33	40	38	353	0.13	0.43	0.39	0.07	0.62	0.07	0.37	0.17	0.1	0.08	0.06	0.06	0.14	0.1	0.08	0.46	0.81	0.13	0.09	0.09	0.07	0.16	0.07	0.08	0.03	0.43
Glyma.09G167900	28	32	32	152	48	113	31	34	34	34	27	31	34	113	71	10	21	27	49	31	36	39	71	466	0.13	0.13	0.04	0.14	0.06	0.14	0.22	0.06	0.05	0.05	0.05	0.31	0.06	0.14	0.14	0.14	0.91	0.06	0.06	0.06	0.27	0.05	0.06	0.03	0.14
Glyma.09G255300	27	29	29	72	101	67	24	28	33	33	28	23	29	64	196	7	22	28	30	24	43	40	162	63	287	0.42	0.07	0.5	0.07	0.41	0.17	0.08	0.06	0.07	0.07	0.17	0.08	0.08	0.6	0.51	0.13	0.08	0.07	0.07	0.17	0.09	0.07	0.02	0.8
Glyma.10G048500	35	38	37	75	185	70	29	33	35	37	31	29	33	69	146	15	22	32	36	31	39	41	149	67	132	294	0.08	0.46	0.08	0.86	0.19	0.09	0.07	0.08	0.07	0.17	0.09	0.09	0.44	0.45	0.13	0.09	0.08	0.08	0.19	0.1	0.09	0.03	0.45
Glyma.10G118400	54	62	62	30	17	26	55	61	63	60	55	56	61	26	29	12	37	56	40	59	34	36	30	24	27	28	161	0.07	0.08	0.07	0.08	0.16	0.2	0.17	0.14	0.05	0.16	0.03	0.07	0.07	0.04	0.21	0.16	0.2	0.06	0.15	0.27	0.04	0.08
Glyma.10G230700	30	33	32	75	116	75	26	33	35	42	31	26	33	73	176	15	22	30	35	30	44	43	231	70	161	151	29	312	0.08	0.44	0.19	0.09	0.06	0.07	0.07	0.17	0.09	0.09	0.53	0.72	0.14	0.08	0.09	0.08	0.19	0.09	0.07	0.03	0.5
Glyma.13G038200	41	42	43	38	21	40	39	47	47	38	38	43	47	42	35	12	32	38	46	40	52	54	34	33	28	31	32	34	312	0.08	0.08	0.1	0.09	0.17	0.16	0.07	0.1	0.05	0.07	0.08	0.06	0.12	0.08	0.11	0.07	0.14	0.1	0.03	0.07
Glyma.13G136300	32	39	38	76	170	70	29	33	35	36	31	29	33	70	139	13	22	31	36	31	38	40	143	67	130	261	28	148	32	301	0.19	0.08	0.07	0.08	0.07	0.18	0.08	0.09	0.41	0.42	0.13	0.09	0.08	0.08	0.19	0.1	0.09	0.03	0.43
Glyma.13G152300	29	30	30	201	47	95	28	37	34	31	30	28	37	95	69	8	20	30	35	28	35	34	71	111	66	72	28	73	32	71	287	0.07	0.07	0.07	0.08	0.45	0.07	0.11	0.19	0.2	0.24	0.09	0.07	0.08	0.73	0.08	0.08	0.02	0.18
Glyma.13G354800	89	110	107	35	28	41	86	95	92	174	87	89	97	41	39	17	36	87	48	91	43	43	47	38	36	39	59	42	47	39	30	356	0.22	0.11	0.11	0.06	0.92	0.04	0.09	0.09	0.06	0.25	0.49	0.19	0.06	0.09	0.25	0.06	0.07
Glyma.14G093800	93	78	79	30	18	26	130	66	69	84	91	137	64	28	33	13	39	93	48	71	32	36	35	33	27	29	58	29	41	29	29	91	267	0.12	0.11	0.05	0.22	0.03	0.07	0.06	0.05	0.19	0.21	0.63	0.06	0.1	0.22	0.06	0.07
Glyma.14G120600	38	36	36	23	17	23	36	35	37	38	37	40	35	25	28	12	30	37	34	35	36	37	24	25	22	26	36	24	56	26	24	41	37	129	0.57	0.05	0.11	0.03	0.08	0.07	0.04	0.12	0.1	0.16	0.06	0.16	0.16	0.03	0.07
Glyma.14G202600	35	42	42	25	16	26	32	39	44	39	36	37	39	28	28	9	30	36	33	40	34	36	26	26	24	23	32	25	53	23	25	40	35	85	147	0.05	0.1	0.03	0.07	0.07	0.05	0.14	0.1	0.15	0.06	0.15	0.16	0.03	0.07
Glyma.14G210600	32	35	36	392	58	123	28	42	36	32	29	29	42	122	77	12	20	29	37	30	40	34	71	155	75	78	28	78	36	79	201	33	30	23	25	436	0.06	0.15	0.17	0.15	0.31	0.07	0.05	0.06	0.55	0.06	0.06	0.03	0.17
Glyma.15G019400	89	110	107	36	26	39	85	96	93	174	88	88	97	40	37	17	36	88	48	91	45	45	46	36	35	39	59	42	47	39	31	335	90	41	40	33	360	0.04	0.08	0.09	0.06	0.25	0.48	0.18	0.06	0.09	0.25	0.06	0.07
Glyma.16G017400	27	31	30	118	51	554	26	34	32	31	31	30	36	710	68	13	21	30	37	26	38	37	71	114	65	69	25	73	42	69	94	41	28	25	27	122	40	750	0.08	0.09	0.14	0.03	0.03	0.03	0.14	0.03	0.03	0.03	0.08
Glyma.16G032600	32	35	35	77	110	70	27	35	36	37	28	27	34	70	301	14	23	28	35	32	45	45	180	71	202	148	30	179	32	140	72	40	32	28	27	79	39	70	332	0.54	0.15	0.08	0.08	0.08	0.18	0.09	0.08	0.03	0.64
Glyma.16G178700	29	31	31	68	112	70	26	33	34	41	33	25	34	72	177	13	20	32	37	28	39	37	287	71	165	146	28	230	34	140	71	41	28	23	25	70	40	72	183	301	0.14	0.08	0.09	0.08	0.19	0.08	0.07	0.03	0.5
Glyma.16G217700	26	31	31	152	47	114	29	32	32	34	27	30	32	115	70	11	20	27	49	30	35	38	70	435	63	67	23	69	31	66	120	38	30	24	25	156	37	116	73	70	477	0.06	0.06	0.05	0.29	0.05	0.05	0.02	0.14
Glyma.17G094400	73	132	131	39	23	32	64	200	262	98	75	67	197	33	34	17	37	76	52	113	47	45	38	36	32	36	62	35	46	36	36	93	70	37	44	39	93	31	35	34	34	287	0.26	0.19	0.08	0.1	0.38	0.06	0.08
Glyma.17G144100	81	108	107	31	26	32	76	95	96	321	84	79	94	33	36	21	37	84	49	84	42	42	45	34	33	37	60	42	37	36	30	176	84	36	37	31	175	32	37	41	34	97	333	0.18	0.06	0.09	0.23	0.05	0.07
Glyma.17G229800	72	66	66	30	18	28	100	60	65	68	76	104	60	30	30	10	37	76	42	64	31	36	29	34	26	29	52	29	44	29	28	71	172	39	37	30	70	30	30	28	30	63	68	207	0.07	0.13	0.24	0.05	0.08
Glyma.18G044200	30	30	30	237	53	113	27	37	34	34	31	28	37	113	75	8	20	31	37	28	37	36	75	133	71	78	27	79	33	79	266	30	29	24	25	242	31	112	76	76	142	36	33	30	361	0.06	0.06	0.02	0.17
Glyma.18G075100	34	34	34	31	25	25	34	33	33	34	35	35	32	25	32	21	29	36	43	33	84	81	29	26	31	33	36	32	44	33	27	33	32	33	33	28	33	25	32	29	27	33	34	35	28	143	0.13	0.03	0.09
Glyma.18G129900	69	141	142	31	20	26	68	113	117	87	71	69	112	25	28	15	39	71	43	176	37	37	33	31	25	32	60	29	41	32	29	91	69	37	41	31	91	25	31	28	31	112	85	66	28	33	206	0.05	0.07
Glyma.18G156000	191	63	63	36	26	40	69	71	74	73	115	73	72	45	41	18	37	112	51	66	48	52	41	37	33	36	50	38	46	35	32	77	70	35	35	37	77	43	43	37	33	74	70	63	34	35	63	1123	0.02
Glyma.18G237700	29	30	29	72	109	69	26	28	32	31	30	25	30	67	211	10	22	30	35	26	44	43	165	68	248	144	29	165	30	140	67	35	31	26	25	77	34	68	217	168	68	31	31	31	71	31	27	33	308
Glyma.19G060700	43	49	50	26	18	21	38	49	48	45	42	39	49	21	26	51	58	43	42	48	38	36	28	23	22	30	39	28	36	30	22	46	41	33	28	25	45	21	28	28	24	48	45	38	22	42	46	47	23
Glyma.19G178000	34	33	32	72	231	69	25	29	33	34	30	25	30	70	135	11	22	30	36	30	40	39	138	69	121	216	25	143	27	203	68	37	31	24	22	78	35	70	136	139	70	33	34	30	73	34	29	34	130
Glyma.19G260900	32	29	29	123	49	682	30	35	35	31	32	33	37	550	74	15	21	33	39	25	42	45	75	114	72	71	27	77	43	72	100	45	34	23	26	126	43	554	77	75	116	34	32	29	117	25	25	48	73
Glyma.20G097900	43	46	47	26	16	23	42	50	48	41	44	45	49	23	29	56	63	43	50	47	43	41	31	25	23	29	40	29	38	29	23	44	46	35	31	25	44	23	31	29	26	48	41	41	24	42	44	52	25
Glyma.20G162800	31	33	32	71	114	71	27	34	36	43	32	27	34	71	179	14	22	31	38	31	44	43	233	73	160	151	29	281	35	147	71	41	30	25	25	74	42	71	182	232	70	36	43	31	76	32	30	37	167
[truncated: 5 more columns]
