# Supplementary material for: Genome-Wide Analysis of CCA1-Like Proteins in Soybean and Functional Characterization of GmMYB138a
Source: Int J Mol Sci. 2017 Sep 22;18(10):2040. doi: 10.3390/ijms18102040 (PMC5666722; doi:10.3390/ijms18102040)
Supplement: Supplementary file 1 [file ijms-18-02040-s001.zip › Table S3.xlsx]

## Sheet: Sheet1
Table S3 Statistics report of CCA1-like genes in soybean
Gene ID	Glyma.01G003000	Glyma.01G038600	Glyma.02G026300	Glyma.02G241000	Glyma.03G177300	Glyma.03G261800	Glyma.04G051000	Glyma.04G177300	Glyma.05G032200	Glyma.05G062300	Glyma.05G222600	Glyma.06G051900	Glyma.06G187600	Glyma.07G048500	Glyma.07G066100	Glyma.07G074300	Glyma.07G074500	Glyma.08G029400	Glyma.08G110200	Glyma.08G293300	Glyma.08G333500	Glyma.08G333600	Glyma.09G131400	Glyma.09G167900	Glyma.09G255300	Glyma.10G048500	Glyma.10G118400	Glyma.10G230700	Glyma.13G038200	Glyma.13G136300	Glyma.13G152300	Glyma.13G354800	Glyma.14G093800	Glyma.14G120600	Glyma.14G202600	Glyma.14G210600	Glyma.15G019400	Glyma.16G017400	Glyma.16G032600	Glyma.16G178700	Glyma.16G217700	Glyma.17G094400	Glyma.17G144100	Glyma.17G229800	Glyma.18G044200	Glyma.18G075100	Glyma.18G129900	Glyma.18G156000	Glyma.18G237700
Glyma.01G003000	837	0.27	0.27	0.13	0.16	0.08	0.31	0.28	0.28	0.27	0.66	0.3	0.28	0.08	0.17	0.16	0.08	0.65	0.22	0.28	0.22	0.22	0.16	0.12	0.14	0.16	0.23	0.17	0.18	0.16	0.19	0.29	0.36	0.17	0.18	0.13	0.28	0.08	0.17	0.18	0.12	0.27	0.27	0.37	0.15	0.2	0.27	0.19	0.17
Glyma.01G038600	278	903	0.91	0.12	0.16	0.08	0.21	0.49	0.49	0.36	0.25	0.21	0.48	0.08	0.18	0.17	0.06	0.25	0.21	0.46	0.21	0.21	0.17	0.13	0.15	0.17	0.18	0.18	0.19	0.16	0.18	0.34	0.24	0.13	0.15	0.12	0.34	0.08	0.18	0.19	0.13	0.48	0.35	0.22	0.15	0.17	0.45	0.09	0.17
Glyma.02G026300	275	839	903	0.13	0.17	0.08	0.2	0.48	0.48	0.35	0.25	0.21	0.48	0.08	0.19	0.17	0.06	0.25	0.21	0.45	0.22	0.22	0.18	0.13	0.16	0.17	0.18	0.19	0.2	0.17	0.18	0.33	0.24	0.14	0.15	0.13	0.34	0.08	0.19	0.2	0.13	0.48	0.34	0.21	0.15	0.17	0.44	0.08	0.17
Glyma.02G241000	189	184	186	1311	0.25	0.21	0.11	0.13	0.12	0.16	0.13	0.11	0.13	0.21	0.27	0.18	0.04	0.13	0.19	0.09	0.18	0.17	0.23	0.44	0.25	0.26	0.07	0.27	0.17	0.25	0.52	0.15	0.13	0.08	0.09	0.93	0.15	0.21	0.27	0.25	0.45	0.13	0.17	0.11	0.58	0.08	0.09	0.1	0.25
Glyma.03G177300	182	184	191	348	900	0.15	0.1	0.19	0.18	0.2	0.16	0.11	0.2	0.15	0.5	0.19	0.07	0.16	0.2	0.13	0.17	0.18	0.41	0.23	0.5	0.78	0.1	0.49	0.18	0.72	0.29	0.21	0.13	0.1	0.11	0.25	0.2	0.15	0.51	0.48	0.23	0.19	0.21	0.13	0.29	0.13	0.14	0.06	0.53
Glyma.03G261800	193	201	199	516	355	2247	0.06	0.09	0.08	0.1	0.07	0.06	0.09	0.81	0.15	0.1	0.03	0.07	0.11	0.06	0.1	0.1	0.13	0.23	0.14	0.15	0.04	0.15	0.11	0.15	0.15	0.11	0.06	0.04	0.05	0.21	0.11	0.81	0.14	0.14	0.23	0.08	0.1	0.07	0.18	0.05	0.07	0.17	0.15
Glyma.04G051000	296	221	216	161	122	150	678	0.21	0.21	0.2	0.3	0.87	0.22	0.06	0.11	0.12	0.05	0.31	0.17	0.22	0.16	0.16	0.12	0.09	0.09	0.1	0.25	0.11	0.12	0.1	0.17	0.22	0.57	0.15	0.15	0.11	0.21	0.06	0.11	0.12	0.1	0.21	0.2	0.45	0.14	0.16	0.22	0.09	0.1
Glyma.04G177300	285	473	470	191	211	219	227	879	0.72	0.34	0.28	0.21	0.93	0.09	0.19	0.18	0.06	0.28	0.22	0.4	0.22	0.22	0.17	0.13	0.17	0.19	0.21	0.19	0.22	0.19	0.19	0.31	0.26	0.15	0.16	0.13	0.31	0.08	0.19	0.2	0.13	0.73	0.33	0.25	0.16	0.18	0.4	0.1	0.2
Glyma.05G032200	278	478	473	182	191	204	217	651	858	0.34	0.28	0.21	0.7	0.08	0.18	0.18	0.06	0.27	0.21	0.41	0.21	0.21	0.16	0.12	0.15	0.17	0.21	0.17	0.21	0.18	0.17	0.33	0.25	0.16	0.18	0.13	0.32	0.08	0.18	0.18	0.12	0.91	0.33	0.26	0.15	0.18	0.41	0.09	0.18
Glyma.05G062300	294	378	370	245	223	256	227	360	360	1002	0.26	0.2	0.34	0.1	0.23	0.19	0.06	0.27	0.23	0.27	0.23	0.23	0.2	0.15	0.18	0.2	0.17	0.22	0.19	0.2	0.21	0.57	0.24	0.15	0.17	0.16	0.56	0.1	0.23	0.23	0.16	0.33	0.93	0.23	0.2	0.15	0.26	0.1	0.2
Glyma.05G222600	569	254	259	195	179	190	278	281	278	287	801	0.29	0.29	0.07	0.16	0.16	0.07	0.94	0.22	0.26	0.21	0.21	0.15	0.12	0.14	0.15	0.24	0.18	0.18	0.15	0.19	0.27	0.37	0.17	0.19	0.13	0.27	0.07	0.17	0.17	0.12	0.28	0.27	0.36	0.15	0.22	0.27	0.14	0.17
Glyma.06G051900	299	235	229	170	129	156	638	236	230	236	286	726	0.22	0.06	0.12	0.12	0.05	0.3	0.17	0.23	0.16	0.16	0.14	0.09	0.09	0.1	0.24	0.11	0.12	0.1	0.17	0.22	0.56	0.14	0.14	0.11	0.21	0.06	0.12	0.12	0.1	0.21	0.2	0.43	0.14	0.16	0.23	0.09	0.11
Glyma.06G187600	283	466	468	198	214	221	232	829	644	362	285	242	885	0.08	0.19	0.18	0.06	0.28	0.22	0.39	0.21	0.22	0.17	0.13	0.16	0.2	0.2	0.2	0.22	0.2	0.19	0.31	0.27	0.15	0.16	0.13	0.31	0.08	0.19	0.2	0.13	0.72	0.33	0.25	0.16	0.18	0.39	0.09	0.19
Glyma.07G048500	201	209	206	508	355	1848	151	214	192	257	192	157	212	2253	0.15	0.1	0.03	0.07	0.12	0.06	0.1	0.1	0.13	0.23	0.14	0.15	0.05	0.15	0.11	0.15	0.15	0.11	0.06	0.05	0.05	0.21	0.11	0.96	0.15	0.14	0.23	0.08	0.1	0.06	0.18	0.05	0.07	0.17	0.15
Glyma.07G066100	195	206	215	374	514	358	134	218	214	263	190	142	214	365	996	0.19	0.06	0.17	0.2	0.12	0.18	0.19	0.52	0.25	0.64	0.5	0.09	0.62	0.18	0.49	0.32	0.25	0.14	0.09	0.1	0.26	0.25	0.15	0.94	0.6	0.26	0.19	0.23	0.12	0.31	0.11	0.13	0.07	0.7
Glyma.07G074300	200	208	209	269	233	254	153	227	219	236	199	160	224	261	244	1158	0.1	0.16	0.32	0.13	0.31	0.3	0.15	0.16	0.16	0.17	0.1	0.19	0.23	0.18	0.17	0.2	0.15	0.1	0.12	0.17	0.21	0.1	0.2	0.18	0.16	0.18	0.19	0.14	0.21	0.13	0.13	0.08	0.16
Glyma.07G074500	75	64	64	63	71	74	48	62	61	62	63	49	61	80	66	124	276	0.07	0.07	0.05	0.06	0.06	0.05	0.04	0.05	0.06	0	0.05	0.08	0.06	0.08	0.06	0.07	0.05	0.09	0.04	0.06	0.03	0.06	0.05	0.05	0.06	0.05	0.07	0.06	0.13	0.05	0.02	0.06
Glyma.08G029400	569	256	258	194	180	191	285	277	271	290	764	294	282	190	198	192	63	804	0.22	0.27	0.21	0.21	0.15	0.11	0.15	0.16	0.25	0.18	0.18	0.15	0.19	0.27	0.37	0.17	0.18	0.13	0.26	0.07	0.18	0.17	0.12	0.27	0.26	0.36	0.15	0.21	0.27	0.14	0.17
Glyma.08G110200	279	270	264	287	255	275	226	280	272	300	283	231	281	291	262	411	93	277	1182	0.17	0.33	0.33	0.16	0.17	0.18	0.19	0.14	0.19	0.27	0.19	0.17	0.24	0.2	0.15	0.15	0.18	0.25	0.11	0.2	0.18	0.18	0.22	0.23	0.2	0.21	0.21	0.17	0.11	0.2
Glyma.08G293300	251	424	417	130	132	158	195	370	365	275	231	208	364	155	140	154	42	233	211	621	0.17	0.17	0.12	0.08	0.12	0.12	0.26	0.13	0.15	0.12	0.14	0.25	0.25	0.22	0.21	0.09	0.25	0.06	0.12	0.14	0.08	0.4	0.26	0.28	0.11	0.23	0.88	0.07	0.13
Glyma.08G333500	272	262	270	267	219	262	207	269	269	294	255	213	268	266	235	388	81	258	416	213	1164	0.88	0.15	0.15	0.18	0.16	0.14	0.18	0.37	0.17	0.16	0.25	0.19	0.12	0.14	0.17	0.26	0.1	0.19	0.17	0.16	0.22	0.24	0.17	0.19	0.17	0.17	0.1	0.18
Glyma.08G333600	273	266	274	264	227	265	209	271	266	289	261	216	271	268	251	375	82	264	414	214	1051	1176	0.16	0.15	0.18	0.16	0.14	0.19	0.36	0.18	0.16	0.25	0.18	0.13	0.14	0.17	0.26	0.1	0.2	0.18	0.16	0.21	0.23	0.16	0.19	0.17	0.18	0.1	0.19
Glyma.09G131400	199	208	218	351	479	341	151	213	208	254	187	167	217	336	604	218	56	195	237	150	222	235	1062	0.21	0.46	0.42	0.09	0.66	0.15	0.4	0.28	0.22	0.15	0.07	0.08	0.22	0.22	0.13	0.53	0.81	0.22	0.17	0.2	0.12	0.25	0.09	0.12	0.08	0.48
Glyma.09G167900	185	201	200	644	350	552	153	204	193	244	186	156	204	549	376	254	71	181	276	126	243	247	348	1401	0.23	0.23	0.06	0.25	0.17	0.23	0.32	0.16	0.1	0.07	0.08	0.43	0.16	0.23	0.25	0.24	0.93	0.13	0.16	0.09	0.37	0.09	0.08	0.1	0.24
Glyma.09G255300	162	174	181	342	479	343	104	184	167	207	163	112	178	345	653	196	48	167	236	125	231	235	521	343	864	0.51	0.09	0.54	0.18	0.49	0.28	0.19	0.11	0.08	0.09	0.24	0.2	0.15	0.66	0.54	0.24	0.16	0.19	0.11	0.29	0.1	0.12	0.06	0.85
Glyma.10G048500	176	183	193	358	726	360	116	205	184	230	170	122	209	358	507	215	64	173	244	126	204	211	484	348	478	885	0.1	0.5	0.18	0.87	0.29	0.21	0.14	0.09	0.1	0.25	0.21	0.15	0.5	0.48	0.24	0.18	0.21	0.13	0.29	0.12	0.13	0.06	0.52
Glyma.10G118400	207	177	177	106	107	116	192	199	194	184	207	194	196	126	103	121	6	211	180	184	172	171	108	97	95	102	486	0.1	0.12	0.1	0.12	0.18	0.26	0.23	0.2	0.07	0.19	0.05	0.09	0.1	0.06	0.2	0.17	0.31	0.09	0.17	0.26	0.06	0.09
Glyma.10G230700	195	201	214	368	488	364	127	220	196	248	200	131	223	364	622	237	51	206	247	140	227	239	733	367	527	499	107	939	0.18	0.48	0.32	0.23	0.14	0.08	0.1	0.26	0.24	0.15	0.63	0.76	0.25	0.18	0.23	0.13	0.3	0.1	0.13	0.07	0.56
Glyma.13G038200	216	230	241	241	208	270	161	259	249	243	221	166	263	258	220	296	77	220	341	174	466	460	212	250	206	209	142	214	939	0.2	0.15	0.21	0.15	0.19	0.2	0.17	0.21	0.11	0.18	0.17	0.16	0.2	0.19	0.17	0.19	0.21	0.16	0.08	0.19
Glyma.13G136300	176	186	197	352	684	363	115	211	191	228	170	122	215	368	507	222	62	171	244	131	222	232	473	353	473	796	106	487	230	906	0.28	0.21	0.13	0.09	0.1	0.25	0.2	0.16	0.49	0.46	0.24	0.19	0.21	0.13	0.29	0.12	0.14	0.06	0.51
Glyma.13G152300	195	186	185	688	301	366	170	196	184	227	192	175	199	368	334	218	74	192	220	137	201	204	321	470	293	300	116	328	190	292	864	0.19	0.18	0.12	0.14	0.52	0.2	0.15	0.32	0.32	0.34	0.18	0.2	0.16	0.74	0.14	0.15	0.06	0.3
Glyma.13G354800	320	368	367	224	241	283	255	343	360	618	299	263	346	289	287	255	70	295	318	280	317	322	283	253	225	242	207	272	262	241	218	1071	0.24	0.15	0.16	0.14	0.93	0.11	0.25	0.25	0.16	0.32	0.58	0.22	0.19	0.15	0.26	0.11	0.21
Glyma.14G093800	346	255	256	194	159	166	480	280	265	275	341	490	284	172	165	194	65	341	265	227	246	238	184	168	131	158	222	163	197	156	184	283	804	0.18	0.18	0.13	0.24	0.07	0.14	0.15	0.11	0.26	0.24	0.69	0.15	0.2	0.24	0.11	0.12
Glyma.14G120600	153	132	136	108	98	112	124	142	144	155	149	127	139	121	98	124	31	148	184	149	152	157	87	105	78	93	139	89	187	92	114	168	162	390	0.67	0.07	0.15	0.05	0.08	0.09	0.06	0.15	0.15	0.24	0.1	0.31	0.21	0.04	0.08
Glyma.14G202600	163	150	151	127	108	134	128	152	166	177	161	131	151	135	115	142	52	158	187	148	172	174	104	122	92	106	131	104	202	108	134	179	157	299	444	0.09	0.16	0.05	0.1	0.1	0.08	0.18	0.17	0.22	0.12	0.33	0.22	0.04	0.09
Glyma.14G210600	191	185	186	1230	344	507	166	194	187	238	196	170	200	505	367	258	66	195	275	135	257	256	344	634	338	354	109	366	239	349	691	217	194	105	122	1311	0.15	0.21	0.26	0.25	0.44	0.13	0.16	0.11	0.58	0.08	0.1	0.1	0.25
Glyma.15G019400	317	374	371	229	230	288	250	348	359	611	298	259	350	293	291	265	70	296	329	279	329	330	284	257	232	237	213	282	268	239	223	1010	283	167	180	223	1083	0.11	0.25	0.25	0.17	0.32	0.56	0.22	0.2	0.16	0.26	0.11	0.22
Glyma.16G017400	200	210	209	517	360	1861	148	212	192	248	190	156	210	2168	372	256	76	189	288	150	261	260	344	544	358	366	119	368	257	371	375	289	174	122	135	513	293	2253	0.15	0.14	0.23	0.08	0.1	0.07	0.18	0.05	0.06	0.17	0.16
Glyma.16G032600	196	201	213	373	524	355	134	221	212	270	194	143	217	371	948	250	69	204	262	139	240	252	616	376	664	507	102	634	219	506	332	287	170	94	111	368	291	376	999	0.61	0.26	0.19	0.24	0.13	0.31	0.11	0.13	0.07	0.71
Glyma.16G178700	197	210	218	347	478	334	136	215	205	257	190	140	218	333	609	222	57	194	238	150	220	231	865	354	519	480	105	730	208	469	315	280	169	88	103	344	281	341	620	906	0.24	0.19	0.23	0.14	0.28	0.11	0.14	0.07	0.55
Glyma.16G217700	197	209	209	658	349	559	161	207	197	258	194	163	207	557	391	262	73	191	294	131	252	256	360	1342	355	355	103	378	251	361	495	265	180	102	120	647	269	550	391	364	1434	0.13	0.16	0.09	0.38	0.08	0.09	0.11	0.25
Glyma.17G094400	275	466	469	193	201	205	220	659	805	350	279	233	653	193	220	219	60	273	275	362	271	268	213	211	173	194	187	204	242	201	193	356	274	143	163	197	358	195	219	210	215	864	0.32	0.26	0.16	0.19	0.4	0.09	0.19
Glyma.17G144100	295	366	361	249	234	252	225	353	350	941	289	235	354	256	270	240	59	288	296	266	296	295	254	249	217	241	187	257	240	239	226	626	270	156	177	243	617	248	277	260	261	341	1002	0.22	0.19	0.14	0.26	0.1	0.21
Glyma.17G229800	317	222	218	158	141	163	364	243	242	243	305	371	246	163	142	168	54	306	250	212	206	201	147	146	123	138	217	144	195	137	153	242	565	166	157	158	246	164	144	149	142	247	239	624	0.13	0.25	0.27	0.09	0.13
Glyma.18G044200	188	192	189	763	342	427	171	199	190	248	187	175	206	434	362	269	69	187	278	138	254	253	333	543	334	334	115	350	232	337	819	246	192	115	138	765	249	444	363	326	565	198	242	158	1086	0.11	0.12	0.08	0.29
Glyma.18G075100	179	162	164	116	127	126	135	171	167	156	185	140	168	133	119	154	70	184	264	161	210	216	110	135	101	120	117	107	203	118	125	173	177	162	173	117	177	132	120	116	131	171	153	176	126	432	0.24	0.05	0.12
Glyma.18G129900	243	415	410	138	145	170	194	366	368	272	235	209	364	165	143	155	42	237	217	556	215	219	152	130	131	137	182	144	180	145	146	282	217	148	153	141	285	161	142	152	138	360	266	206	146	164	621	0.07	0.13
Glyma.18G156000	650	314	304	346	239	582	309	342	327	356	477	326	339	591	254	295	76	476	376	261	360	357	292	375	217	228	221	263	301	234	221	384	376	146	161	349	388	582	257	242	383	322	357	321	283	177	258	3372	0.07
Glyma.18G237700	190	193	195	351	511	361	124	215	194	228	187	130	209	366	705	203	58	188	251	135	234	241	554	356	798	502	97	560	216	498	310	247	148	88	98	349	252	375	716	553	370	202	235	143	341	118	142	248	927
Glyma.19G060700	181	165	161	205	201	213	130	176	171	194	178	129	165	219	198	425	215	174	282	113	275	267	174	216	171	191	106	186	251	199	183	181	161	120	140	205	182	215	205	172	215	168	190	158	213	138	125	241	177
Glyma.19G178000	179	174	182	343	827	343	120	197	183	214	173	129	200	344	506	226	69	172	254	126	214	221	478	340	473	711	101	487	210	675	288	228	153	90	103	340	218	350	514	476	341	194	226	143	327	123	137	233	502
Glyma.19G260900	207	223	223	541	360	2143	179	227	205	281	204	197	229	1848	395	276	74	205	297	154	284	289	399	573	358	373	116	384	265	374	390	308	192	111	135	535	312	1859	390	359	578	210	280	163	458	130	165	635	381
Glyma.20G097900	158	160	160	175	182	188	116	172	168	172	164	117	164	188	167	376	221	160	250	124	245	227	147	191	145	172	79	157	244	181	148	161	154	107	120	171	162	187	175	145	186	167	171	145	185	144	127	212	155
Glyma.20G162800	206	211	225	365	482	348	142	227	208	261	209	148	229	348	613	246	52	215	263	151	229	244	738	355	518	485	125	875	202	481	330	281	185	95	112	363	289	356	626	737	368	214	270	166	346	107	154	273	552
[truncated: 5 more columns]
