# Supplementary material for: Genome-Wide Analysis of CCA1-Like Proteins in Soybean and Functional Characterization of GmMYB138a
Source: Int J Mol Sci. 2017 Sep 22;18(10):2040. doi: 10.3390/ijms18102040 (PMC5666722; doi:10.3390/ijms18102040)
Supplement: Supplementary file 1 [file ijms-18-02040-s001.zip › Table S4-2.xlsx]

## Sheet: Sheet1
Table S2 Segmental duplication events during evluotion of CCA1-like MYBs in soybean
	LOCUS_1	LOCUS_2	BLOCK_NO	BLOCK_SCORE	E_VALUE	Ka	Ks	Ka/Ks	Identity
1	Glyma.02G026300	Glyma.01G038600	8	5673	2e-127	0.0231	0.1484	0.15566	0.91
2	Glyma.14G210600	Glyma.02G241000	245	9852	0	0.0455	0.1291	0.35244	0.93
3	Glyma.10G048500	Glyma.03G177300	347	9420	8e-163	0.1324	0.5475	0.241826	0.78
	Glyma.13G136300	Glyma.03G177300	376	5278	2e-147	0.2209	0.628	0.351752	0.72
4	Glyma.16G017400	Glyma.03G261800	390	1882	0	0.1341	0.3727	0.359807	0.81
5	Glyma.19G260900	Glyma.03G261800	409	42241	0	0.0408	0.0711	0.57384	0.87
6	Glyma.19G178000	Glyma.03G177300	409	42241	0	0.0461	0.0912	0.505482	0.91
	Glyma.05G032200	Glyma.04G177300	428	4582	1e-88	0.2029	0.7159	0.283419	0.72
7	Glyma.06G051900	Glyma.04G051000	437	31732	4e-113	0.0446	0.131	0.340458	0.87
8	Glyma.04G177300	Glyma.06G187600	446	28247	8e-144	0.0301	0.1419	0.212121	0.93
	Glyma.14G093800	Glyma.04G051000	497	3892	7e-54	0.2749	0.6876	0.399796	0.57
9	Glyma.08G029400	Glyma.05G222600	571	17759	2e-165	0.0272	0.0882	0.30839	0.94
10	Glyma.17G144100	Glyma.05G062300	622	8291	0	0.0225	0.2065	0.108959	0.93
11	Glyma.17G094400	Glyma.05G032200	628	5624	7e-147	0.0321	0.121	0.265289	0.91
12	Glyma.16G017400	Glyma.07G048500	867	9097	0	0.0236	0.0851	0.277321	0.96
13	Glyma.16G032600	Glyma.07G066100	867	9097	0	0.0403	0.0884	0.455882	0.94
	Glyma.19G260900	Glyma.07G048500	889	2161	0	0.1428	0.3775	0.378278	0.74
14	Glyma.18G129900	Glyma.08G293300	985	12791	6e-114	0.0978	0.2806	0.348539	0.88
	Glyma.10G230700	Glyma.09G131400	999	2293	2e-142	0.1379	0.632	0.218196	0.66
15	Glyma.16G178700	Glyma.09G131400	1035	8316	0	0.0205	0.1455	0.140893	0.81
16	Glyma.16G217700	Glyma.09G167900	1035	8316	0	0.0321	0.0699	0.459227	0.93
17	Glyma.09G255300	Glyma.18G237700	1054	12765	7e-155	0.0666	0.1934	0.344364	0.85
	Glyma.20G162800	Glyma.09G131400	1066	2055	3e-133	0.1339	0.599	0.223539	0.63
18	Glyma.13G136300	Glyma.10G048500	1102	9393	5e-168	0.0847	0.2058	0.411565	0.87
19	Glyma.16G178700	Glyma.10G230700	1121	2264	3e-148	0.1405	0.6864	0.204691	0.76
20	Glyma.19G178000	Glyma.10G048500	1133	8853	4e-163	0.1176	0.4918	0.239122	0.78
21	Glyma.20G162800	Glyma.10G230700	1157	35199	0	0.0382	0.1121	0.340767	0.86
22	Glyma.15G019400	Glyma.13G354800	1329	13713	0	0.0272	0.1546	0.175938	0.93
	Glyma.18G044200	Glyma.13G152300	1353	359	3e-152	0.0314	0.0947	0.331573	0.74
	Glyma.19G178000	Glyma.13G136300	1359	5005	1e-147	0.1933	0.5485	0.352416	0.73
	Glyma.17G229800	Glyma.14G093800	1389	11453	6e-119	0.0771	0.0956	0.806485	0.69
	Glyma.19G260900	Glyma.16G017400	1448	2081	0	0.1348	0.3734	0.361007	0.74
	Glyma.20G162800	Glyma.16G178700	1452	2034	2e-131	0.1359	0.6304	0.215577	0.73
