# Supplementary material for: Genome-Wide Analysis of CCA1-Like Proteins in Soybean and Functional Characterization of GmMYB138a
Source: Int J Mol Sci. 2017 Sep 22;18(10):2040. doi: 10.3390/ijms18102040 (PMC5666722; doi:10.3390/ijms18102040)
Supplement: Supplementary file 1 [file ijms-18-02040-s001.zip › Table S5.xlsx]

## Sheet: Sheet1
Table S5 The FPKM value of CCA1-like MYB genes in different tissues
ID	Nodules	Root	Root Hairs	Leaves	Stem	SAM	Flower	Pod	Seed	Minimal FPKM	Maximal FPKM	Maximal fold change
Glyma.01G003000	4.096	0.875	2.036	8.753	13.461	3.553	0.187	3.304	0.086	0.187	13.461	71.984
Glyma.01G038600	4.583	1.234	6.851	66.145	8.355	6.542	6.099	7.011	6.873	1.234	66.145	53.6021
Glyma.02G026300	23.153	8.838	17.556	78.845	23.417	14.82	21.887	23.983	8.177	8.177	78.845	9.64229
Glyma.02G241000	1.811	8.161	4.046	6.822	3.049	0.998	3.438	1.762	3.573	0.998	8.161	8.17735
Glyma.03G177300	0.307	0.048	0	1.169	0.252	0.177	1.451	0.346	0	0	1.451	#DIV/0!
Glyma.03G261800	0.394	3.433	0.728	202.563	3.794	4.07	14.129	6.19	1.397	0.394	202.563	514.119
Glyma.04G051000	2.11	0	0.228	0	0	0.029	0	0.016	0.053	0	2.11	#DIV/0!
Glyma.04G177300	17.632	15.444	42.255	14.383	34.939	20.659	8.935	25.193	9.272	8.935	42.255	4.72916
Glyma.05G032200	87.774	129.885	89.76	54.414	54.05	53.683	38.966	56.81	17.355	17.355	129.885	7.48401
Glyma.05G062300	30.964	21.876	27.348	31.609	25.183	28.946	44.69	25.555	29.734	21.876	44.69	2.04288
Glyma.05G222600	17.174	3.308	10.993	0.964	1.648	0.036	0.011	0.009	0.035	0.009	17.174	1908.22
Glyma.06G051900	0.47	0	0.946	0.339	0	0.152	0.056	0.108	0.177	0	0.946	#DIV/0!
Glyma.06G187600	49.205	12.469	52.978	25.014	39.826	13.126	17.408	19.391	13.387	12.469	52.978	4.24878
Glyma.07G048500	3.997	7.803	4.715	59.75	10.986	18.746	10.561	9.994	5.444	3.997	59.75	14.9487
Glyma.07G066100	5.136	6.859	5.817	9.824	6.364	3.375	10.49	8.452	7.886	3.375	10.49	3.10815
Glyma.07G074300	0	0	0.044	0.121	0.049	0.084	1.439	0.166	0.424	0	1.439	#DIV/0!
Glyma.07G074500	0.053	0.611	0.09	0.22	0	0.053	0.103	0.058	0.464	0	0.611	#DIV/0!
Glyma.08G029400	30.151	11.141	14.419	5.894	3.845	7.406	0.04	0.097	2.256	0.04	30.151	753.775
Glyma.08G110200	0	0	0	0	0	0	0	0	0	0	0	#DIV/0!
Glyma.08G293300	2.32	0.548	1.535	22.816	10.454	4.802	13.209	10.072	3.007	0.548	22.816	41.635
Glyma.08G333500	0	0	0	0	0	0	0	0	0	0	0	#DIV/0!
Glyma.08G333600	0	0	0	0	0	0	0	0	0	0	0	#DIV/0!
Glyma.09G131400	3.909	4.935	3.417	5.221	7.316	3.707	7.621	5.179	4.059	3.417	7.621	2.23032
Glyma.09G167900	3.101	18.551	8.428	30.172	8.416	3.223	6.153	25.862	5.11	3.101	30.172	9.72976
Glyma.09G255300	1.069	0.117	0.422	0.538	0.418	0.6	0.937	0.685	0.166	0.117	1.069	9.13675
Glyma.10G048500	0.564	2.638	1.029	26.773	0.474	0.688	7.836	1.525	0.376	0.376	26.773	71.2048
Glyma.10G118400	0	0	0	0	0	0	0.243	0	0	0	0.243	#DIV/0!
Glyma.10G230700	1.443	0.443	0.757	2	3.249	1.096	2.936	1.849	0.803	0.443	3.249	7.33409
Glyma.13G038200	0.409	0.29	0.391	1.075	0.332	0.52	0.349	0.556	0.443	0.29	1.075	3.7069
Glyma.13G136300	2.391	9.378	2.235	32.587	1.506	1.762	5.693	3.51	1.408	1.408	32.587	23.1442
Glyma.13G152300	4.121	7.863	7.385	7.527	3.148	2.248	0.713	2.8	3.231	0.713	7.863	11.0281
Glyma.13G354800	4.896	5.612	5.758	14.284	7.489	5.643	23.503	6.621	4.449	4.449	23.503	5.28276
Glyma.14G093800	1.077	0.454	0.405	1.138	1.149	8.702	0.405	0.402	0.268	0.268	8.702	32.4701
Glyma.14G120600	0	0.145	0	0.079	0	0	0.05	0.085	0	0	0.145	#DIV/0!
Glyma.14G202600	0	0	0.023	0.028	0	0	0.142	0.015	0	0	0.142	#DIV/0!
Glyma.14G210600	0.461	2.724	0.625	14.183	1.218	0.301	0.943	0.831	3.542	0.301	14.183	47.1196
Glyma.15G019400	4.91	3.996	4.635	2.441	3.389	1.301	14.723	1.234	0.579	0.579	14.723	25.4283
Glyma.16G017400	14.083	33.22	17.983	169.619	43.933	41.226	48.475	30.02	11.013	11.013	169.619	15.4017
Glyma.16G032600	5.221	4.39	4.821	3.546	4.765	2.067	6.842	5.605	8.266	2.067	8.266	3.99903
Glyma.16G178700	4.19	6.287	4.738	5.889	5.993	4.091	10.997	6.119	4.34	4.091	10.997	2.6881
Glyma.16G217700	1.915	10.895	4.6	23.298	2.576	2.539	5.62	9.17	7.759	1.915	23.298	12.1661
Glyma.17G094400	68.457	113.765	76.189	62.437	29.981	34.08	59.967	41.428	5.597	5.597	113.765	20.3261
Glyma.17G144100	15.97	17.846	15.039	17.821	15.391	23.057	27.091	16.799	17.051	15.039	27.091	1.80138
Glyma.17G229800	0.022	0.691	0.038	0.311	0.213	0.465	0.04	0.537	0.692	0.022	0.691	31.4091
Glyma.18G044200	1.293	3.931	1.592	6.385	2.493	1.196	5.962	2.855	1.963	1.196	6.385	5.33863
Glyma.18G075100	0	0	0	0	0	0	0	0	0	0	0	#DIV/0!
Glyma.18G129900	0.109	0.133	0.373	0.702	0.893	0.714	0.083	0.47	0.284	0.109	0.702	6.44037
Glyma.18G156000	1.237	1.088	1.417	1.932	1.02	1.606	1.613	1.318	1.38	1.02	1.932	1.89412
Glyma.18G237700	0.52	0.701	0.641	7.278	1.525	3.738	3.174	2.147	0.433	0.433	7.278	16.8083
Glyma.19G060700	0	0	0	0	0	0	0	0	0	0	0	#DIV/0!
Glyma.19G178000	0.098	0.185	0.45	8.823	0.16	0.096	3.562	0.485	0.131	0.098	8.823	90.0306
Glyma.19G260900	0.731	0.617	0.433	55.653	6.665	2.547	3.872	5.301	2.168	0.433	55.653	128.529
Glyma.20G097900	0	0	0	0	0	0	0.021	0	0	0	0.021	#DIV/0!
Glyma.20G162800	1.662	0.378	1.43	4.765	6.09	3.393	42.493	10.437	2.31	0.378	42.493	112.415
