# Supplementary material for: Genome-Wide Analysis of CCA1-Like Proteins in Soybean and Functional Characterization of GmMYB138a
Source: Int J Mol Sci. 2017 Sep 22;18(10):2040. doi: 10.3390/ijms18102040 (PMC5666722; doi:10.3390/ijms18102040)
Supplement: Supplementary file 1 [file ijms-18-02040-s001.zip › Table S6.xlsx]

## Sheet: Sheet1
Table S6 Primers used in the study
ID	Sequence (5'-3')	Purpose
qGmSGF14l-F	ACACAACACAACGCACAAAC	qRT-PCR
qGmSGF14l-R	TTCTTCATAGCGTTCGGCTT	qRT-PCR
qGmMYB138a-F	GCGCAAGCGAGGTGTTCCTT	qRT-PCR
qGmMYB138a-R	CGCCATCGTTTCTTGCGGAA	qRT-PCR
qGmSUBI-F	GTGTAATGTTGGATGTGTTCCC	qRT-PCR
qGmSUBI-R	ACACAATTGAGTTCAACACAAACCG	qRT-PCR
GmMYB138a-F	GGGGACAAGTTTGTACAAAAAAGCAGGCTTCATGTCTCGCACGTGCTCA	Gene cloning
GmMYB138a-R	GGGGACCACTTTGTACAAGAAAGCTGGGTCGGGAGCAACGCTGATGATACTATCC	Gene cloning
GmMYB138b-F	GGGGACAAGTTTGTACAAAAAAGCAGGCTTCATGATTAATTGCGATGGAGTTTTTGGA	Gene cloning
GmMYB138b-R	GGGGACCACTTTGTACAAGAAAGCTGGGTCGGGAGCAACGCTGATGATACTATCC	Gene cloning
GmSGF14l-F	GGGGACAAGTTTGTACAAAAAAGCAGGCTTCATGGCCTCCACCAAGGAAC	Gene cloning
GmSGF14l-R	GGGGACCACTTTGTACAAGAAAGCTGGGTCGGGCTATGCATTGTCACCTCCAGCAGCTC	Gene cloning
